# Supplementary material for: Nutraceuticals in Personalized and Precision Medicine – a preliminary scoping review indicates efficacy for disease treatment, general wellbeing, and defense against Covid-19
Source: Preprints.org preprint supplement (doi:10.20944/preprints202211.0070.v1), 2022-11-03
Supplement: Supplementary file 1 [file supplementary]

## Sheet: Rayyan-keywords-unique count
Number	Keyword	Occurences
1	Dietary_Supplements	60
2	Probiotics	57
3	Vitamins	51
4	Vitamin_B_Complex	49
5	Vitamin_E	49
6	Folic_Acid	41
7	Riboflavin	41
8	Vitamin_D	40
9	Biotin	39
10	Vitamin_A	39
11	Vitamin_U	39
12	Arachidonic_Acid	35
13	Ascorbic_Acid	29
14	Tocopherols	24
15	Liver	19
16	Humanism	18
17	Humanities	18
18	Humans	18
19	Obesity	16
20	Antioxidants	14
21	Brain	12
22	Liver_Diseases	12
23	Inflammation	10
24	Colorectal_Neoplasms	9
25	Inflammatory_Bowel_Diseases	9
26	Life_Style	9
27	Mice	9
28	Pregnancy	9
29	Alcoholics	8
30	Fatty_Liver	8
31	Multiple_Sclerosis	7
32	Oxalic_Acid	7
33	Rats	7
34	Breast_Neoplasms	6
35	Cardiovascular_Diseases	6
36	Food	6
37	Genome	6
38	Genomics	6
39	Herbal_Medicine	6
40	Intestines	6
41	Polyphenols	6
42	Prostate	6
43	Sports	6
44	Adolescent	5
45	Alzheimer_Disease	5
46	Biological_Markers	5
47	Child	5
48	Cohort_Studies	5
49	Fatty_Acids,_Unsaturated	5
50	Fatty_Alcohols	5
51	Mass_Spectrometry	5
52	Military_Personnel	5
53	Norisoprenoids	5
54	Only_Child	5
55	Prostatic_Neoplasms	5
56	Genotype	4
57	Pilot_Projects	4
58	Weight_Loss	4
59	Asthma	3
60	Autistic_Disorder	3
61	Chromatography,_High_Pressure_Liquid	3
62	Cognition	3
63	Complementary_Therapies	3
64	Computational_Biology	3
65	Depressive_Disorder	3
66	Depressive_Disorder,_Major	3
67	Diabetes_Complications	3
68	DNA_(Cytosine-5-)-Methyltransferase	3
69	Docosahexaenoic_Acids	3
70	Exercise	3
71	Fermentation	3
72	Fruit	3
73	Gastrectomy	3
74	Gastroenteritis	3
75	Homeostasis	3
76	Immunotherapy	3
77	Infant	3
78	Insulin_Resistance	3
79	Macular_Degeneration	3
80	Microbiota	3
81	Nutritional_Status	3
82	Osteoarthritis	3
83	Osteoporosis	3
84	Pain_Management	3
85	Pharmacogenetics	3
86	Polymorphism,_Single_Nucleotide	3
87	Signal_Transduction	3
88	Survivors	3
89	Anorexia	2
90	Anorexia_Nervosa	2
91	Anti-Bacterial_Agents	2
92	Anxiety	2
93	Apoptosis	2
94	Atrial_Fibrillation	2
95	Body_Weight	2
96	Bone_and_Bones	2
97	Bone_Density	2
98	Butyrates	2
99	Cachexia	2
100	Caffeine	2
101	Canada	2
102	Case-Control_Studies	2
103	Cesarean_Section	2
104	Choline	2
105	Chondroitin_Sulfates	2
106	Chromatography,_Gas	2
107	Chromatography,_Thin_Layer	2
108	Chronic_Disease	2
109	Colitis	2
110	Collagen	2
111	Colonic_Neoplasms	2
112	Continental_Population_Groups	2
113	Critical_Illness	2
114	Crohn_Disease	2
115	Dermatan_Sulfate	2
116	Diarrhea	2
117	Dietary_Carbohydrates	2
118	Diet,_Mediterranean	2
119	Dreams	2
120	Erectile_Dysfunction	2
121	Fatty_Acids,_Volatile	2
122	Fish_Oils	2
123	Food_Hypersensitivity	2
124	Gels	2
125	Glucosamine	2
126	Head_and_Neck_Neoplasms	2
127	Horses	2
128	Immune_System	2
129	Infant,_Newborn	2
130	Iron	2
131	Liver_Neoplasms	2
132	Macrophages	2
133	Magnesium	2
134	Metformin	2
135	Migraine_Disorders	2
136	Molecular_Biology	2
137	MSH_Release-Inhibiting_Hormone	2
138	Neoplasms	2
139	Neuroprotective_Agents	2
140	Nurses,_Community_Health	2
141	Nursing_Homes	2
142	Nutritional_Support	2
143	Osteoarthritis,_Knee	2
144	Ovarian_Neoplasms	2
145	Oxidative_Stress	2
146	Oxytocin	2
147	Pancreatitis	2
148	Parkinson_Disease	2
149	Preventive_Medicine	2
150	Prospective_Studies	2
151	Psychotic_Disorders	2
152	Quality_Control	2
153	Radiotherapy	2
154	Receptors,_Calcitriol	2
155	Recovery_of_Function	2
156	Reward	2
157	Sciatic_Nerve	2
158	Selenium	2
159	Skin	2
160	Social_Control,_Formal	2
161	Social_Control,_Informal	2
162	Solvents	2
163	Thinking	2
164	Thioctic_Acid	2
165	Vegetables	2
166	Zinc	2
167	1-Butanol	1
168	Abdominal_Pain	1
169	Acetylcysteine	1
170	Acne_Vulgaris	1
171	Acquired_Immunodeficiency_Syndrome	1
172	Adiponectin	1
173	Adipose_Tissue	1
174	Administration,_Oral	1
175	Aerosols	1
176	Alanine	1
177	Algorithms	1
178	Alleles	1
179	alpha-Galactosidase	1
180	alpha-N-Acetylgalactosaminidase	1
181	Analgesics,_Opioid	1
182	Angiopoietins	1
183	Anticoagulants	1
184	Antidotes	1
185	Antihypertensive_Agents	1
186	Antineoplastic_Agents	1
187	Antiviral_Agents	1
188	Apoferritins	1
189	Apolipoprotein_C-I	1
190	Apolipoprotein_E4	1
191	Apolipoproteins_B	1
192	Apolipoproteins_C	1
193	Apolipoproteins_E	1
194	Ascorbic_Acid_Deficiency	1
195	Asia,_Southeastern	1
196	Atrophy	1
197	Attention_Deficit_Disorder_with_Hyperactivity	1
198	Avitaminosis	1
199	Azoxymethane	1
200	Bacteria	1
201	Behavior,_Addictive	1
202	Bifidobacterium	1
203	Bile_Acids_and_Salts	1
204	Biocompatible_Materials	1
205	Biological_Assay	1
206	Biological_Availability	1
207	Biopsy	1
208	Biotransformation	1
209	Bipolar_Disorder	1
210	Birth_Weight	1
211	Bismuth	1
212	Blood_Donors	1
213	Blood_Pressure	1
214	Body_Composition	1
215	Bone_Resorption	1
216	Brain_Ischemia	1
217	Breath_Tests	1
218	Butanols	1
219	Calcium,_Dietary	1
220	Cannabinoids	1
221	Cannabis	1
222	Capsaicin	1
223	Capsules	1
224	Carbonic_Anhydrase_II	1
225	Carbonic_Anhydrase_V	1
226	Carbon_Isotopes	1
227	Carboxylesterase	1
228	Carcinoma,_Hepatocellular	1
229	Carcinoma,_Squamous_Cell	1
230	Carnitine	1
231	Carnosine	1
232	Cartilage	1
233	Cerebellar_Ataxia	1
234	Cerebral_Arteries	1
235	Chelating_Agents	1
236	Child_Development_Disorders,_Pervasive	1
237	Cholecalciferol	1
238	Cholinesterase_Inhibitors	1
239	Citrus	1
240	Colombia	1
241	Colon	1
242	Comorbidity	1
243	Coronary_Disease	1
244	C-Peptide	1
245	Cyclooxygenase_2	1
246	Cysteine	1
247	Cytochrome_P-450_CYP2D6	1
248	Cytosine	1
249	Decision_Making	1
250	Dementia	1
251	Dextran_Sulfate	1
252	Diabetic_Angiopathies	1
253	Diagnosis,_Dual_(Psychiatry)	1
254	Dietary_Fats	1
255	Dietary_Fiber	1
256	Diet,_Fat-Restricted	1
257	Diet,_Protein-Restricted	1
258	Diet_Therapy	1
259	Discrimination_(Psychology)	1
260	DNA,_A-Form	1
261	DNA-(Apurinic_or_Apyrimidinic_Site)_Lyase	1
262	DNA,_B-Form	1
263	DNA_Damage	1
264	Dogs	1
265	Dopamine	1
266	Dopamine_Agonists	1
267	Doping_in_Sports	1
268	Drug-Induced_Liver_Injury	1
269	Drug_Resistance,_Microbial	1
270	Drug_Resistance,_Multiple	1
271	Eating	1
272	Eicosapentaenoic_Acid	1
273	Emergencies	1
274	Emergency_Medical_Services	1
275	Encephalitis	1
276	Endothelin-1	1
277	Ephedrine	1
278	Erythrocytes	1
279	Estrogens	1
280	Expert_Testimony	1
281	Fatty_Acids,_Monounsaturated	1
282	Fees_and_Charges	1
283	Ferritins	1
284	Fibrinolytic_Agents	1
285	Fibromyalgia	1
286	Fingers	1
287	Flavonoids	1
288	Fluoridation	1
289	Fluorides	1
290	Food_Additives	1
291	Food-Drug_Interactions	1
292	Food,_Formulated	1
293	Food,_Fortified	1
294	Fractures,_Bone	1
295	France	1
296	Fungi	1
297	gamma-Aminobutyric_Acid	1
298	Gastrointestinal_Agents	1
299	Gastrointestinal_Diseases	1
300	Gene_Expression	1
301	Genetic_Variation	1
302	Glucans	1
303	Glutamate_Decarboxylase	1
304	Glutamic_Acid	1
305	Habituation,_Psychophysiologic	1
306	Health_Promotion	1
307	Helicobacter_pylori	1
308	Hepatic_Encephalopathy	1
309	HIV_Infections	1
310	Homocysteine	1
311	Hospital_Costs	1
312	Hydrocarbons	1
313	Hydrocarbons,_Aromatic	1
314	Hydrophobic_and_Hydrophilic_Interactions	1
315	Immunoglobulin_A	1
316	Immunoglobulin_D	1
317	Immunoglobulin_E	1
318	Immunoglobulin_G	1
319	Immunoglobulin_M	1
320	Immunoglobulins	1
321	Immunoglobulin_Variable_Region	1
322	India	1
323	Indians,_North_American	1
324	Infant,_Low_Birth_Weight	1
325	Infant,_Very_Low_Birth_Weight	1
326	Insulin	1
327	Insulin-Like_Growth_Factor_I	1
328	Insulins	1
329	Intervention_Studies	1
330	Italy	1
331	Ketone_Bodies	1
332	Ketones	1
333	Kidney	1
334	Kidney_Diseases	1
335	Lactic_Acid	1
336	Lactobacillus	1
337	Lactobacillus_reuteri	1
338	Laser_Therapy	1
339	Length_of_Stay	1
340	Leukemia	1
341	Limbic_System	1
342	Linoleic_Acid	1
343	Linoleic_Acids	1
344	Lipid_Metabolism	1
345	Liver_Transplantation	1
346	Lung	1
347	Lung_Diseases	1
348	Lung_Diseases,_Obstructive	1
349	Lung_Neoplasms	1
350	Manitoba	1
351	Mass_Screening	1
352	Mast_Cells	1
353	Medicare	1
354	Medicine,_Chinese_Traditional	1
355	Menopause	1
356	Mental_Disorders	1
357	Metabolic_Diseases	1
358	Methionine	1
359	Methyltransferases	1
360	Mice,_Obese	1
361	Middle_Aged	1
362	Milk_Ejection	1
363	Milk,_Human	1
364	Milk_Thistle	1
365	Mitochondria	1
366	Morus	1
367	Motor_Activity	1
368	Movement_Disorders	1
369	Natural_Killer_T-Cells	1
370	Nepal	1
371	Neurodegenerative_Diseases	1
372	Neuronal_Plasticity	1
373	Nickel	1
374	Nitrites	1
375	Nutrigenomics	1
376	Nutrition_Policy	1
377	Osteoblasts	1
378	Ovary	1
379	Ovum	1
380	Oxidation-Reduction	1
381	Pancreatic_Neoplasms	1
382	Patient_Selection	1
383	Periodontal_Diseases	1
384	Periodontics	1
385	Peripheral_Nerve_Injuries	1
386	Peripheral_Nerves	1
387	Peripheral_Nervous_System_Diseases	1
388	Permeability	1
389	Phenotype	1
390	Phospholipases	1
391	Physical_Fitness	1
392	Placebo_Effect	1
393	Plants,_Medicinal	1
394	Poland	1
395	Polycystic_Kidney,_Autosomal_Dominant	1
396	Polycystic_Kidney_Diseases	1
397	Polycystic_Ovary_Syndrome	1
398	Polymerization	1
399	Polymers	1
400	Polymorphism,_Genetic	1
401	Polysaccharides	1
402	Powders	1
403	Prebiotics	1
404	Prediabetic_State	1
405	Pre-Eclampsia	1
406	Pregnancy_Outcome	1
407	Prostaglandin-Endoperoxide_Synthases	1
408	Prostatism	1
409	Prostatitis	1
410	Proteome	1
411	Proteomics	1
412	Pulmonary_Disease,_Chronic_Obstructive	1
413	Quality-Adjusted_Life_Years	1
414	Quality_of_Life	1
415	Quinidine	1
416	Rabbits	1
417	Rats,_Sprague-Dawley	1
418	Receptors,_Cannabinoid	1
419	Receptors,_GABA-A	1
420	Respiratory_Sounds	1
421	Respiratory_System	1
422	Respiratory_Tract_Infections	1
423	Retrospective_Studies	1
424	Rheumatic_Diseases	1
425	Risk_Factors	1
426	Self-Fertilization	1
427	Serine	1
428	Sex_Characteristics	1
429	Sirolimus	1
430	Sjogren's_Syndrome	1
431	Small_Cell_Lung_Carcinoma	1
432	Software	1
433	Southeastern_United_States	1
434	Spirulina	1
435	Staphylococcus	1
436	Staphylococcus_epidermidis	1
437	Starch	1
438	Starch_Synthase	1
439	Stereoisomerism	1
440	Stomach	1
441	Stomatitis	1
442	Stroke	1
443	Suicide	1
444	Survival_Rate	1
445	Synbiotics	1
446	Taiwan	1
447	Tears	1
448	tert-Butyl_Alcohol	1
449	Testosterone	1
450	Therapeutic_Equivalency	1
451	Tissue_Donors	1
452	Trace_Elements	1
453	Travel	1
454	Tryptophan	1
455	Type_C_Phospholipases	1
456	Urinary_Bladder_Neoplasms	1
457	Vagina	1
458	Vancomycin	1
459	Vietnam	1
460	Vitamin_A_Deficiency	1
461	Vitamin_B_6	1
462	Vitamin_B_Deficiency	1
463	Vitamin_D_Deficiency	1
464	Vitamin_E_Deficiency	1
465	Vitamin_K	1
466	Wound_Healing	1
467	Yeasts	1
468	Yohimbine	1

## Sheet: PubMed-keywords-unique-count
Number	Keyword	Occurences
1	COVID	11
2	probiotic	11
3	probiotics	11
4	diet	9
5	dietary supplements	8
6	obesity	8
7	diet	7
8	nutraceutical	7
9	inflammation	6
10	microbiota	6
11	prebiotics	6
12	AlzheimerÆs disease	5
13	antioxidant	5
14	epigenetics	5
15	food	5
16	inflammation	5
17	Inflammation	5
18	Lactobacillus	5
19	microbiome	5
20	nutrition	5
21	osteoporosis	5
22	precision medicine	5
23	pregnancy	5
24	supplementation	5
25	anti	4
26	antioxidants	4
27	Bariatric surgery	4
28	cancer	4
29	cholecalciferol	4
30	clinical trial	4
31	diabetes	4
32	dietary supplement	4
33	frailty	4
34	functional food	4
35	gut microbiota	4
36	gut microbiota	4
37	IBD	4
38	inflammatory bowel disease	4
39	microbiota	4
40	minerals	4
41	Muscle	4
42	nutrition	4
43	nutrition	4
44	omega	4
45	personalized medicine	4
46	personalized medicine	4
47	personalized nutrition	4
48	resveratrol	4
49	Short	4
50	Vitamin D	4
51	weight loss	4
52	Atherosclerosis	3
53	Bacteria	3
54	Bifidobacterium	3
55	bone health	3
56	breast cancer	3
57	calcium	3
58	cancer	3
59	cardiovascular diseases	3
60	colorectal cancer	3
61	Crohn's disease	3
62	Cystic fibrosis	3
63	diabetes mellitus	3
64	diet	3
65	Diet	3
66	diet	3
67	dietary intervention	3
68	dietary supplements	3
69	Dietary supplements	3
70	dysbiosis	3
71	fatty acids	3
72	fecal microbiota transplantation	3
73	gastroenteritis	3
74	gene	3
75	genomics	3
76	Gut microbiome	3
77	gut microbiome	3
78	gut microbiota	3
79	immune system	3
80	insulin	3
81	insulin resistance	3
82	lifestyle	3
83	meta	3
84	metabolic syndrome	3
85	metabolomics	3
86	Microbiome	3
87	microbiome	3
88	Microbiota	3
89	NAFLD	3
90	nanoparticles	3
91	non	3
92	Nutraceuticals	3
93	nutraceuticals	3
94	nutrigenomics	3
95	Nutrition	3
96	Nutrition	3
97	Nutritional supplements	3
98	Nutritional support	3
99	Omega	3
100	omega	3
101	Oxidative stress	3
102	Personalized medicine	3
103	personalized nutrition	3
104	polyphenols	3
105	prebiotics	3
106	precision medicine	3
107	Precision medicine	3
108	precision nutrition	3
109	pregnancy	3
110	Probiotics	3
111	probiotics	3
112	probiotics	3
113	Probiotics	3
114	probiotics	3
115	probiotics	3
116	randomized controlled trial	3
117	sarcopenia	3
118	sarcopenia	3
119	SARS	3
120	Single nucleotide polymorphisms	3
121	therapeutics	3
122	vitamin E	3
123	vitamins	3
124	zinc	3
125	adolescents	2
126	Ageing	2
127	Aging	2
128	aging	2
129	aging	2
130	Alzheimer's disease	2
131	Anorexia nervosa	2
132	antibiotics	2
133	antioxidants	2
134	apoptosis	2
135	arachidonic acid	2
136	asthma	2
137	atherosclerosis	2
138	Autism spectrum disorders	2
139	Bifidobacterium spp.	2
140	bile acids	2
141	bioavailability	2
142	bioengineering	2
143	Biomarker	2
144	Biomarkers	2
145	BMI	2
146	breast cancer	2
147	cancer	2
148	cardiovascular disease	2
149	cardiovascular risk	2
150	catabolic markers	2
151	catechin	2
152	Chemotherapy	2
153	children	2
154	chronic obstructive pulmonary disease	2
155	chronic pain	2
156	clinical nutrition	2
157	Cognition	2
158	collagen	2
159	collagen hydrolysates	2
160	colon cancer	2
161	Comorbidity	2
162	Complementary medicine	2
163	Constipation	2
164	cytokines	2
165	dementia	2
166	depression	2
167	depression	2
168	DHA	2
169	dietary assessment	2
170	dietary fatty acids	2
171	dietary supplements	2
172	dose	2
173	dysbiosis	2
174	dysbiosis	2
175	Dysbiosis	2
176	Ecdysterone	2
177	eicosanoids	2
178	elderly	2
179	energy balance	2
180	Epigenome	2
181	ERAS	2
182	Fat mass	2
183	fecal transplantation	2
184	flavonoids	2
185	food supplements	2
186	functional food	2
187	gene therapy	2
188	Genetics	2
189	genotype	2
190	Gut microbiome	2
191	gut microbiome	2
192	gut microbiome	2
193	Gut microbiota	2
194	Gut microbiota	2
195	gut microbiota	2
196	Head and neck cancer	2
197	health benefit	2
198	hepatocellular carcinoma	2
199	Herbal medicine	2
200	Herbal medicines	2
201	High	2
202	HIV	2
203	HPTLC	2
204	hypertension	2
205	Hypertension	2
206	hypodopaminergia	2
207	IBS	2
208	Immune checkpoint inhibitor	2
209	Immunity	2
210	immunomodulation	2
211	Immunomodulation	2
212	immunotherapy	2
213	in vitro repair	2
214	Inflammation	2
215	inflammation	2
216	Insulin resistance	2
217	integrative medicine	2
218	Integrative medicine	2
219	interleukin	2
220	intestinal microbiome	2
221	inulin	2
222	iron	2
223	iron metabolism	2
224	irritable bowel syndrome	2
225	LCûMS/MS	2
226	Live biotherapeutic products	2
227	Liver steatosis	2
228	Lucid dreams	2
229	magnesium	2
230	Malnutrition	2
231	Malnutrition	2
232	mass spectrometry	2
233	matrix	2
234	Mendelian randomization	2
235	menopause	2
236	Mental health	2
237	metabolic syndrome	2
238	metabolism	2
239	microbiome	2
240	microbiome	2
241	Microbiota	2
242	microbiota	2
243	microbiota	2
244	microglia	2
245	miRNA	2
246	mitochondrial dysfunction	2
247	mortality	2
248	mycobiome	2
249	n	2
250	next	2
251	NMR	2
252	Nutraceutical	2
253	nutraceutical	2
254	nutraceuticals	2
255	nutraceuticals	2
256	nutraceutics	2
257	nutrients	2
258	nutrigenetics	2
259	nutrigenetics	2
260	Nutrigenomics	2
261	nutrigenomics	2
262	nutritional status	2
263	obesity	2
264	Obesity	2
265	obesity	2
266	Omega	2
267	omega	2
268	osteoarthritis	2
269	Oxalate	2
270	Oxidative stress	2
271	oxidative stress	2
272	Oxidative stress	2
273	pain	2
274	ParkinsonÆs disease	2
275	pediatric	2
276	PEMT pathway	2
277	personalized medicine	2
278	personalized medicine	2
279	Personalized nutrition	2
280	personalized nutrition	2
281	Phosphodiesterase	2
282	physical activity	2
283	phytochemicals	2
284	polyphenols	2
285	pre	2
286	prebiotic	2
287	Prebiotic	2
288	prebiotics	2
289	precision	2
290	precision medicine	2
291	precision nutrition	2
292	Precision nutrition	2
293	prenatal choline supplementation	2
294	prevention	2
295	pro	2
296	Probiotic	2
297	probiotic bacteria	2
298	probiotics	2
299	Probiotics	2
300	probiotics	2
301	prostate cancer	2
302	Quantification	2
303	Quinidine	2
304	RCT	2
305	review	2
306	riboflavin	2
307	Safety	2
308	sarcopenia	2
309	Sarcopenia	2
310	senescence	2
311	signaling pathways	2
312	Sleeve gastrectomy	2
313	supplements	2
314	T lymphocytes	2
315	Targeted therapy	2
316	therapy	2
317	Transcriptome	2
318	type 2 diabetes	2
319	Ulcerative colitis	2
320	VDR	2
321	vitamin D	2
322	Vitamin D	2
323	Vitamin D	2
324	Vitamin D	2
325	vitamin K	2
326	1	2
327	*Bioactives	1
328	*Colon cancer	1
329	*Metabolome	1
330	*Microbiome	1
331	?????,???,?????	1
332	16s rRNA	1
333	2'	1
334	24 h recall	1
335	25(OH)D 1	1
336	25(OH)D 25	1
337	31 anti	1
338	3D spheroids	1
339	ABCA4 gene mutation	1
340	Accuracy	1
341	Acetaldehyde	1
342	Achillea	1
343	Acid	1
344	acidification	1
345	acne vulgaris	1
346	acute diarrhea	1
347	Acute lymphoblastic leukemia	1
348	Acute pancreatitis	1
349	acute stress	1
350	addiction	1
351	Addiction Severity Index (ASI)	1
352	ADHD	1
353	Adherence	1
354	Adiponectin	1
355	adipose	1
356	adipose tissue	1
357	Adipose tissue	1
358	adiposity	1
359	ADORA2A	1
360	advanced compartment and transit (ACAT)	1
361	Adverse events	1
362	aerobic exercise	1
363	AFR	1
364	Aging	1
365	aging	1
366	Aging diet	1
367	Agnus castus	1
368	Akkermansia muciniphila	1
369	alcohol abuse	1
370	Alcoholic dependence syndrome	1
371	Alcoholic liver cirrhosis	1
372	alcoholic liver disease	1
373	Alcoholism	1
374	Algal oil	1
375	alkylglycerols	1
376	allergic rhinitis	1
377	Allium cepa test	1
378	alpha	1
379	Alpha lipoic acid	1
380	Alternative medicine	1
381	AlzheimerÆs disease and cognitive decline	1
382	AlzheimerÆs prevention	1
383	AlzheimerÆs risk reduction	1
384	American Indians	1
385	Amino acid therapy	1
386	Amino acids	1
387	aminoacyl tRNA synthetase	1
388	amniotic membrane	1
389	AMPK	1
390	amygdala	1
391	amyloid	1
392	amyotrophic lateral sclerosis	1
393	Anabolic agents	1
394	anabolic androgenic steroids	1
395	Anaemia	1
396	Analytical method	1
397	ancestry	1
398	And next	1
399	Anemia	1
400	anemia	1
401	Ang	1
402	Angiopoietin	1
403	Animal model	1
404	Animal models	1
405	animal models	1
406	animal models of human atherosclerosis	1
407	anthocyanins	1
408	Anti	1
409	antibiotic	1
410	antibiotic resistance	1
411	antibody	1
412	anticancer agents	1
413	anticancer delivery vehicle	1
414	Anticancer drug	1
415	anticancer effect	1
416	anticancer strategy	1
417	Anticancer therapy	1
418	anticancer therapy	1
419	Antidepressants	1
420	Antiepileptics	1
421	antigout	1
422	Antihistamines	1
423	antimicrobial peptide	1
424	antimicrobial resistance	1
425	antiosteoporosis	1
426	Antioxidant activity	1
427	antioxidant capacity	1
428	antioxidant cocktails	1
429	antioxidant enzymes	1
430	Antioxidants	1
431	Antiresorptive	1
432	Antispasmodics	1
433	antiviral drugs	1
434	antiviral effect	1
435	Anxiety	1
436	anxiety	1
437	APOE	1
438	ApoE genotype	1
439	APOE methylation	1
440	ApoE4	1
441	appendix skeletal muscle index	1
442	approach	1
443	Arachidonic acid	1
444	Aristolochia indica	1
445	Aristolochic acid	1
446	artificial sweeteners	1
447	ASA24	1
448	ascorbic acid	1
449	Asparaginase	1
450	aspartate transcarbamoylase	1
451	asthma endotype	1
452	astrocytes	1
453	Atherosclerosis	1
454	atherosclerosis	1
455	athletes	1
456	Attention	1
457	attention	1
458	attenuated	1
459	autism spectrum disorder	1
460	autoimmune diseases	1
461	autophagy	1
462	Autosomal dominant polycystic kidney disease	1
463	Ayurgenomics	1
464	Ayurveda	1
465	azoxymethane (AOM)	1
466	B	1
467	B vitamins	1
468	Bacillus cereus	1
469	bacteria	1
470	bacterial	1
471	bacterial lysates	1
472	bacterial networks	1
473	bacteriocin	1
474	Barberry	1
475	basket design	1
476	BDDCS	1
477	BDNF	1
478	beetroot	1
479	Behaviour change	1
480	Berberine	1
481	Berberis	1
482	berries	1
483	beta	1
484	Beta	1
485	betaine	1
486	bifidobacterium	1
487	Bile	1
488	bilirubin	1
489	bio	1
490	bioactive food components	1
491	bioactive lipids	1
492	Bioavailability	1
493	bioconversion	1
494	biodiversity	1
495	Bioequivalence	1
496	Bioinformatics	1
497	biologic therapy	1
498	Biological activity	1
499	biological applications	1
500	biological barrier	1
501	biological medicine	1
502	biomarkers	1
503	biomaterial	1
504	biopreservation	1
505	bioproduct	1
506	Bioprofiles	1
507	Biopsychosocial dysfunction	1
508	bioreactor	1
509	biorepository	1
510	biotherapeutics	1
511	bipolar disorder	1
512	birth defects	1
513	Birth weight	1
514	bismuth quadruple therapy	1
515	bladder cancer	1
516	blood pressure	1
517	Blood pressure	1
518	bloodûbrain barrier	1
519	Body composition	1
520	Bodybuilding	1
521	Bone	1
522	bone mineral density	1
523	Bone turnover markers	1
524	Borrelia burgdorferi	1
525	Botanical fingerprints	1
526	botanicals	1
527	bovine colostrum	1
528	brain	1
529	Brain health	1
530	brain health	1
531	brain health	1
532	brain reward cascade	1
533	Brain Reward Circuitry	1
534	Branched	1
535	Breast cancer	1
536	Breast cancer	1
537	Breast milk	1
538	broad gene expression	1
539	BSH	1
540	Bulnesia sarmienti	1
541	Butterbur	1
542	butyrate	1
543	butyrate (short	1
544	bycatch waste management	1
545	C	1
546	c	1
547	C. monstrosa cartilage	1
548	Cachexia	1
549	cachexia	1
550	caffeine	1
551	caffeine metabolism	1
552	calcitriol	1
553	Calcium ion channel antagonists	1
554	Camellia	1
555	cAMP	1
556	Cancer	1
557	Cancer	1
558	cancer cachexia	1
559	Cancer care	1
560	Cancer hallmarks	1
561	cancer immunosurveillance	1
562	cancer patients	1
563	cancer prevention	1
564	Cancer prevention	1
565	cancer risk	1
566	cancer survivors	1
567	cancer therapeutics	1
568	Cancer therapy	1
569	Cannabinoid receptor	1
570	capsaicin	1
571	capsaicinoid	1
572	carbamoyl phosphate synthetase	1
573	carbohydrate	1
574	carbohydrate restriction	1
575	carbonic anhydrase inhibitors	1
576	carbonic anhydrase IX	1
577	Carbonic anhydrases	1
578	carboxymethylcellulose	1
579	Carcinogenesis	1
580	cardioprotection	1
581	Cardiopulmonary fitness	1
582	cardiovascular	1
583	Cardiovascular disease	1
584	Cardiovascular disease	1
585	cardiovascular disease	1
586	cardiovascular disease	1
587	Cardiovascular disease	1
588	cardiovascular outcomes	1
589	Carnosine	1
590	carnosine	1
591	cART	1
592	cartilage Galeus melastomus by	1
593	case	1
594	Case report	1
595	Case series	1
596	catechins	1
597	Ceftriaxone	1
598	cell lines	1
599	cell migration	1
600	central nervous system (CNS) diseases	1
601	ceramide	1
602	cerebellar ataxia	1
603	Cerebral ischemia	1
604	Characterization	1
605	Charcot	1
606	cheese	1
607	Cheese	1
608	chelation	1
609	chemical analysis	1
610	Chemical ionisation	1
611	chemoprevention	1
612	Chemoprevention	1
613	Chemoradiation	1
614	chemoradiotherapy	1
615	chemoresistance	1
616	chemotherapy	1
617	child	1
618	child asthma	1
619	child sex	1
620	child wheeze	1
621	childhood abuse	1
622	children and adolescents	1
623	chili	1
624	Chinese	1
625	Chiral separation	1
626	cholemia	1
627	cholestasis	1
628	Cholesterol	1
629	cholesterol	1
630	cholesterol	1
631	choline metabolome	1
632	chondrocyte	1
633	Chondroitin sulfate isolation	1
634	chondroitin sulfate production	1
635	chronic diseases	1
636	chronic kidney disease	1
637	chronic rhinosinusitis	1
638	chrono	1
639	cirrhosis	1
640	CKD	1
641	clinical ecology	1
642	clinical parameters	1
643	clinical research/practice	1
644	clinical translation	1
645	Clinical trials	1
646	cluster analysis	1
647	Cluster randomised controlled trial	1
648	coenzyme Q10	1
649	cofactors	1
650	cognition	1
651	Cognitive function	1
652	cognitive function	1
653	cognitive training	1
654	cohorts	1
655	colitis	1
656	Collaborative care	1
657	Colon cancer	1
658	colon cancer prevention	1
659	colonic fermentation	1
660	colorectal cancer	1
661	Colorectal cancer	1
662	Colorectal cancer	1
663	colorectal cancer cell	1
664	colorimetric probe	1
665	Commercial probiotics	1
666	Community	1
667	Community health workers	1
668	Comparative oncology	1
669	complementary cancer therapies	1
670	Complex diseases	1
671	complex I	1
672	Complex interventions	1
673	congenital disorder of glycosylation	1
674	congenital zika syndrome	1
675	conjugated linoleic acid	1
676	Connectivity volume	1
677	Consejo dietΘtico	1
678	control	1
679	controlled release	1
680	CoQ10	1
681	COQ5	1
682	cord blood	1
683	Coronary artery disease	1
684	coronavirus	1
685	Coronavirus disease (COVID	1
686	Correction factor	1
687	corticosteroids	1
688	Corticosterone	1
689	cost	1
690	Counterfeit	1
691	covid	1
692	CRAT deficiency	1
693	CrohnÆs disease	1
694	CRT	1
695	cryopreservation	1
696	curcumin	1
697	Customized DNA based therapy	1
698	Cyclooxygenase	1
699	Cyclooxygenase (COX)	1
700	CYP1A2	1
701	CYP2R1	1
702	CYP3A4	1
703	cytochrome P450	1
704	Cytokine regulatory effect	1
705	cytotoxic	1
706	cytotoxic activity	1
707	Cytotoxicity	1
708	d	1
709	daganatok	1
710	dairy cow	1
711	dairy products	1
712	DASH diet	1
713	databases	1
714	DBS	1
715	de novo pyrimidine biosynthesis	1
716	decellularized scaffold	1
717	delivery of health care	1
718	Dementia	1
719	depression	1
720	Depression	1
721	Depression	1
722	designer probiotics	1
723	Desnutrici≤n	1
724	DHA and EPA	1
725	DHR Study	1
726	diabetes	1
727	Diabetes	1
728	Diagnostics	1
729	diarrhea	1
730	diatoms	1
731	Diet	1
732	Diet	1
733	diet	1
734	Diet	1
735	diet and exercise	1
736	diet supplements	1
737	dietary bioactives	1
738	dietary changes	1
739	Dietary counseling	1
740	dietary fat modification	1
741	dietary fiber	1
742	dietary fibre	1
743	Dietary flavonols	1
744	dietary guidelines	1
745	Dietary habits	1
746	dietary intake	1
747	dietary intakes	1
748	Dietary intervention	1
749	dietary patterns	1
750	dietary recommendations	1
751	dietary recommendations from the DûAûCH countries (Germany (D), Austria (A), and	1
752	Dietary sugar	1
753	Dietary supplementation	1
754	dietary supplementation	1
755	Dietary supplementation	1
756	dietary supplementation	1
757	dietary supplements	1
758	dietary supplements	1
759	dietary supplements	1
760	Dietary supplements	1
761	Dietary supplements	1
762	Dietary supplements	1
763	Dietary supplements	1
764	dietry asupplement	1
765	Digestion	1
766	dihydroorotase	1
767	Direct bioautography	1
768	disease	1
769	disease modification	1
770	disease prevention	1
771	dissolution comparison	1
772	dissolution medium	1
773	DNA Customization	1
774	DNA damage	1
775	DOCA	1
776	docosahexaenoic acid	1
777	docosahexaenoic acid	1
778	Docosahexaenoic acid	1
779	docosahexaenoic acid (DHA)	1
780	dog	1
781	Dopamine	1
782	dopamine	1
783	dopamine	1
784	Dopamine	1
785	dopamine	1
786	Dopamine Agnostic therapy	1
787	dopamine homeostasis	1
788	Doping	1
789	Doping and personal genomics	1
790	Doseûresponse	1
791	DRIs	1
792	Drug	1
793	drug	1
794	drug delivery	1
795	drug development	1
796	Drug discovery	1
797	Drugs	1
798	DTC direct	1
799	dual diagnosis	1
800	dual energy X	1
801	DûAûCH recommendations	1
802	duchenne muscular dystrophy	1
803	Dysbiosis	1
804	Dysbiosis	1
805	Dysbiosis	1
806	dyslipidemia	1
807	Dyslipidemias	1
808	dysmetabolism	1
809	Dysphagia	1
810	dystonia	1
811	Early psychosis	1
812	eating habits survey	1
813	Ecdysteroids	1
814	ecosystems	1
815	Effect	1
816	Effect of treatment	1
817	Efficacy	1
818	Egg	1
819	Eicosanoid	1
820	eicosapentaenoic acid	1
821	eicosapentaenoic acid (EPA)	1
822	elective surgical procedures	1
823	emergency service	1
824	emulsifiers	1
825	Enantioseparation	1
826	encephalomyopathies	1
827	encephalopathy	1
828	endocannabinoid	1
829	endocannabinoid system	1
830	endocannabinoids	1
831	endothelial dysfunction	1
832	Endothelial dysfunction	1
833	endothelial dysfunction	1
834	energy consumption	1
835	engineered probiotics	1
836	engineering nanoparticles	1
837	enteral nutrition	1
838	environment	1
839	environmental factors	1
840	Environmental toxicants	1
841	enzimp≤tlßs	1
842	Enzymatic hydrolysis	1
843	enzyme supplementation	1
844	EPA	1
845	EPA and DHA	1
846	epidemiology	1
847	epigenetic changes	1
848	epithelial	1
849	epithelial to mesenchymal transition	1
850	equine model	1
851	eradication	1
852	ergocalciferol	1
853	Escherichia coli	1
854	ESPEN guidelines	1
855	Evolutionary genetic adaption	1
856	executive function	1
857	exercise	1
858	Exercise	1
859	exercise	1
860	Exercise intervention	1
861	expert commentary	1
862	extraskeletal disease	1
863	Ez Texan	1
864	Faecalibacterium prausnitzii	1
865	fat quality	1
866	Fatigue	1
867	fatness	1
868	fatty acid desaturase	1
869	fatty acid desaturase genes	1
870	fatty acid desaturases 1 and 2 (FADS1/2)	1
871	fatty acid signaling	1
872	fatty acid synthase	1
873	fatty acids	1
874	Fatty acids	1
875	fecal microbiota transplantation	1
876	Fecal microbiota transplantation	1
877	Fecal microbiota transplantation	1
878	Fecal microbiota transplantation	1
879	fecal water	1
880	female health	1
881	fermentation	1
882	Fermented dairy products	1
883	fermented tea	1
884	ferritin	1
885	Ferroptosis	1
886	ferrous sulfate	1
887	fertility	1
888	FEV1%pred	1
889	Fiber	1
890	fibre	1
891	finger millet	1
892	First trimester pregnancy	1
893	fisetin	1
894	Fish oil	1
895	Fish oils	1
896	fish oils	1
897	fit factors	1
898	flora intervention	1
899	flow	1
900	FM fat mass	1
901	focal electroretinogram	1
902	FODMAP	1
903	Foeniculum vulgare	1
904	folate	1
905	folate requirement	1
906	folic acid	1
907	Folic acid	1
908	Follow	1
909	food additives	1
910	food composition	1
911	food fortification	1
912	food preservatives	1
913	food processing	1
914	food pyramid	1
915	food starter	1
916	Food4Me study	1
917	Foods for special medical purposes	1
918	Football	1
919	Fractures	1
920	free vitamin D metabolites	1
921	Fructo	1
922	fruits and vegetables	1
923	fucosterol	1
924	Functional brain connectivity	1
925	functional crop	1
926	Functional food	1
927	functional foods	1
928	functional magnetic resonance imaging (fMRI)	1
929	functional nutrition	1
930	functional recovery	1
931	future trends	1
932	GABA	1
933	GABAergic system	1
934	GARS	1
935	gas chromatography	1
936	gastrointestinal	1
937	gastrointestinal microbiome	1
938	gastrointestinal microbiota	1
939	gastrointestinal motility	1
940	Gastrointestinal toxicity	1
941	gastrointestinal tract	1
942	GC	1
943	GC, precision genetics	1
944	gemcitabine	1
945	Gender medicine	1
946	Gene	1
947	gene editing	1
948	gene x diet interaction	1
949	genes	1
950	Genetic Addiction Risk Score	1
951	Genetic Addiction Risk Score (GARS)	1
952	Genetic Addiction Risk Severity (GARS) test	1
953	Genetic Addiction Risk Severity (GARS) Test	1
954	genetic factors	1
955	genetic risk score	1
956	Genetic variant	1
957	genetic variations	1
958	genetics	1
959	Genetics	1
960	genetics	1
961	geneûdiet interactions	1
962	geneûnutrient interaction	1
963	genital tract diseases	1
964	Genome	1
965	genome wide association studies	1
966	Genomic instability	1
967	Genomics	1
968	Genotoxicity	1
969	Genotype knowledge	1
970	geriatric syndrome	1
971	gerotarget	1
972	gestational diabetes	1
973	Ginger	1
974	gingivitis	1
975	GIP	1
976	glignans	1
977	GLP	1
978	Glucosamine	1
979	glucose	1
980	Glucose	1
981	glucose	1
982	Glucose	1
983	glucose homeostasis	1
984	glutathione	1
985	gluten	1
986	Glycemia	1
987	glycemic index	1
988	glycemic status	1
989	Glycogen	1
990	glycolysis	1
991	Glycosylation	1
992	green synthesis	1
993	guidelines	1
994	Gut	1
995	gut	1
996	Gut	1
997	gut	1
998	Gut	1
999	gut	1
1000	gut colonization	1
1001	gut dysbiosis	1
1002	Gut flora	1
1003	gut health	1
1004	Gut microbiome	1
1005	Gut microbiota	1
1006	gut microbiota	1
1007	Gut microbiota	1
1008	gut microbiota composition	1
1009	gutûliver	1
1010	GWAS	1
1011	H	1
1012	H2+2CH4 threshold	1
1013	Haemoglobin	1
1014	haptoglobin	1
1015	Haptoglobin	1
1016	haptoglobin polymorphism	1
1017	HDL	1
1018	head and neck squamous cell cancer	1
1019	headache	1
1020	health	1
1021	Health 2011 survey	1
1022	health disparities	1
1023	health food products	1
1024	health information	1
1025	Health literay	1
1026	healthy diet	1
1027	Heart	1
1028	heart	1
1029	Helicobacter pylori	1
1030	Hematopoietic cell transplantation	1
1031	hemodialysis	1
1032	hepatectomy	1
1033	hepatic differentiation	1
1034	hepatic encephalopathy	1
1035	Hepatitis C virus	1
1036	Hepatocellular carcinoma	1
1037	Hepatotoxicity	1
1038	hepcidin	1
1039	herb	1
1040	Herbal	1
1041	Herbal dietary supplements	1
1042	herbal plants and medicine	1
1043	herbal therapy	1
1044	high	1
1045	high performance thin layer chromatography	1
1046	High performance thin layer chromatography (HPTLC)	1
1047	HILIC	1
1048	HILIC/MS/MS	1
1049	Hip fracture	1
1050	HLA	1
1051	HNSCC	1
1052	hoarding and shopping behaviors	1
1053	holistic	1
1054	Home visiting	1
1055	homeostasis	1
1056	Homocysteine	1
1057	hormone	1
1058	hospital	1
1059	host	1
1060	HPLC	1
1061	human	1
1062	human chondrocytes	1
1063	human disease	1
1064	Human gut microbiota	1
1065	human health	1
1066	Human health	1
1067	Hydration	1
1068	hydroxyanthracene derivatives	1
1069	hyperglycemia	1
1070	Hyperglycemia	1
1071	hyperlipidemia	1
1072	Hypertension	1
1073	Hypoglycemia	1
1074	hypolactasia	1
1075	hypozincemia	1
1076	identification	1
1077	Illegal adulteration	1
1078	image	1
1079	Immune	1
1080	immune activation	1
1081	immune cell	1
1082	immune functionality	1
1083	immune modulating activity	1
1084	immune regulation	1
1085	immune response	1
1086	Immune response	1
1087	immune system	1
1088	Immune system	1
1089	immunity	1
1090	immunity	1
1091	immuno	1
1092	immunobiology	1
1093	immunoglobulin A	1
1094	immunoglobulins	1
1095	immunomodulators	1
1096	immunomodulatory	1
1097	immunonutrition	1
1098	immunosenescence	1
1099	immunostimulation	1
1100	immunosuppression/immune modulation	1
1101	immunotherapy response	1
1102	immunotherapy toxicity	1
1103	Improved metabolism	1
1104	In vitro model	1
1105	in vitro studies	1
1106	In vivo	1
1107	in vivo application	1
1108	Individual Participant Data	1
1109	individual response	1
1110	Individualome	1
1111	Infancy	1
1112	infection and infectious agents	1
1113	infections	1
1114	infectious disease	1
1115	Inflammation	1
1116	inflammation	1
1117	Inflammatory	1
1118	Inflammatory bowel diseases	1
1119	Insulin autoimmune syndrome	1
1120	Insulin resistance	1
1121	insulin resistance	1
1122	insulin resistance	1
1123	Insulin sensitivity	1
1124	insulin sensitivity	1
1125	Insulinemia	1
1126	integrated management	1
1127	integrative	1
1128	Integrative medicine	1
1129	Integrative model	1
1130	integrative oncology	1
1131	Integrative oncology	1
1132	integrative treatment	1
1133	intensive care	1
1134	Interleukin	1
1135	Intermittent	1
1136	Internet	1
1137	intervention	1
1138	intervention response variability	1
1139	intestinal bacteria	1
1140	intestinal epithelium	1
1141	intestinal homeostasis	1
1142	intestinal inflammation	1
1143	intestinal malabsorption	1
1144	intestinal microbiota	1
1145	Intestinal microbiota	1
1146	intestinal microbiota	1
1147	intestinal mucosal barriers	1
1148	Intestinal tract	1
1149	intestine	1
1150	intoxication	1
1151	intra	1
1152	intranasal route	1
1153	Iodine nutrition study design	1
1154	iodine supplementation	1
1155	ion	1
1156	iron deficiency	1
1157	iron status	1
1158	iron stores	1
1159	iron supplementation	1
1160	irritable bowel syndrome	1
1161	Irritable bowel syndrome	1
1162	isoflavones	1
1163	kaempferol	1
1164	KB200Z	1
1165	KB220z	1
1166	ketogenesis	1
1167	knee	1
1168	Komagataella pastoris	1
1169	l	1
1170	L. plantarum IS	1
1171	Lactation	1
1172	Lactic acid bacteria	1
1173	lactic acid bacteria	1
1174	lactobacillus	1
1175	Lactobacillus plantarum	1
1176	lactose	1
1177	lactose malabsorption	1
1178	lakt≤z	1
1179	Laser gene	1
1180	LC	1
1181	LCûDADûMS	1
1182	Lean body mass	1
1183	Leigh	1
1184	Leigh syndrome	1
1185	lethal concentration	1
1186	Levocarnitine	1
1187	levodopa	1
1188	Licorice	1
1189	life course nutrition	1
1190	Lifestyle behaviors	1
1191	lifestyle factors	1
1192	Lifestyle medicine	1
1193	lipid	1
1194	Lipid	1
1195	lipid and glucose metabolism	1
1196	lipid metabolism	1
1197	Lipid metabolism	1
1198	lipids	1
1199	lipopolysaccharide	1
1200	Lipoprotein lipase	1
1201	lipoproteins	1
1202	Liquid biopsy	1
1203	Liquid chromatography	1
1204	Liraglutide	1
1205	liraglutide	1
1206	Listeria monocytogenes	1
1207	lithium	1
1208	liver cirrhosis	1
1209	Liver markers	1
1210	liver tissue engineering	1
1211	liver transplantation	1
1212	living therapeutics	1
1213	long	1
1214	Longevity	1
1215	low	1
1216	Low capacity running rat (LCR)	1
1217	low protein diet	1
1218	lutein	1
1219	luteolin	1
1220	lyme disease	1
1221	machine learning	1
1222	macrophages	1
1223	Macular degeneration	1
1224	major depressive disorder (MDD)	1
1225	Malabsorption	1
1226	Male hypogonadism	1
1227	malnutrition	1
1228	malnutrition	1
1229	Malnutrition	1
1230	management	1
1231	marine algae	1
1232	mast cells	1
1233	master protocol	1
1234	maternalûfetal exchange	1
1235	mathematical model	1
1236	matrix metalloproteinases	1
1237	Mechanisms	1
1238	mediation analysis	1
1239	medical food	1
1240	medicinal plants	1
1241	medicinal protein	1
1242	medicine	1
1243	Mediterranean diet	1
1244	MEGDEL	1
1245	MELAS	1
1246	membrane	1
1247	membrane fatty acids	1
1248	membrane lipidomics	1
1249	Memory	1
1250	memory	1
1251	menaquinone	1
1252	menopausal symptoms	1
1253	Menstrual monitoring	1
1254	mercury (II) ion	1
1255	MERRF	1
1256	Meta	1
1257	meta	1
1258	Meta	1
1259	metabolic diseases	1
1260	metabolic disturbances	1
1261	metabolic inflammation	1
1262	Metabolic modeling	1
1263	Metabolic networks	1
1264	metabolic profile	1
1265	Metabolic syndrome	1
1266	Metabolism	1
1267	metabolites	1
1268	metabolome	1
1269	metabolomic profile	1
1270	Metabolomics	1
1271	Metabolomics	1
1272	Metagenome	1
1273	Metagenomic	1
1274	metagenomics	1
1275	metastasis	1
1276	metastatic cancers	1
1277	Metformin	1
1278	metformin	1
1279	Method validation	1
1280	method validation	1
1281	methods of 25	1
1282	MHO metabolically healthy obese	1
1283	miang	1
1284	Microbial dysbiosis	1
1285	microbial engineering	1
1286	Microbial metabolites	1
1287	microbial metabolites	1
1288	Microbial metabolites	1
1289	microbiome	1
1290	Microbiome	1
1291	Microbiome	1
1292	Microbiome	1
1293	Microbiome	1
1294	microbiome	1
1295	microbiome manipulation	1
1296	microbiome therapeutics	1
1297	Microbiota	1
1298	Microbiota	1
1299	microbiota alteration	1
1300	microbiota metabolism	1
1301	Microecological agents	1
1302	microfluidics	1
1303	microgels	1
1304	Micronutrients	1
1305	Migraine	1
1306	migraine	1
1307	mild cognitive impairment	1
1308	Mild cognitive impairment	1
1309	mild cognitive impairment	1
1310	Milk	1
1311	milk	1
1312	mind	1
1313	MIND diet	1
1314	Minimally invasive liver resections	1
1315	Mitochondria	1
1316	mitochondrial carriers	1
1317	Mitochondrial damage	1
1318	mitochondrial diseases	1
1319	Mitochondrial Dysfunction	1
1320	mitochondrial impairment	1
1321	Mitogen	1
1322	mitophagy	1
1323	MK	1
1324	modulation of gut microbiome	1
1325	Molecular diagnostics	1
1326	molecular mechanism	1
1327	molecular mechanisms	1
1328	Molecular weight	1
1329	molecular weight glycosaminoglycans determination	1
1330	monounsaturated fat	1
1331	Mood disorders	1
1332	movement	1
1333	MRM	1
1334	MS	1
1335	MTHFR	1
1336	mTOR	1
1337	mucosa	1
1338	Multi	1
1339	multidisciplinary pain management	1
1340	Multidomain	1
1341	multidrug resistance	1
1342	multimodal	1
1343	muscle atrophy	1
1344	Muscle mass	1
1345	Muscle strength	1
1346	myasthenia gravis	1
1347	myricetin	1
1348	N	1
1349	NAD?+?precursor	1
1350	named entity recognition, natural language processing	1
1351	NAMPT	1
1352	Nano	1
1353	Nanoceria	1
1354	nanoformulations	1
1355	nanomedicine	1
1356	Nanoparticles	1
1357	Nanotechnology	1
1358	nanotechnology	1
1359	nanotheranostics	1
1360	NASH	1
1361	nasogastric	1
1362	nasopharyngeal cancer	1
1363	National Health and Nutrition Examination Survey	1
1364	native microbiome	1
1365	natural approach	1
1366	natural compounds	1
1367	natural diet and exercise	1
1368	natural environments	1
1369	Natural products	1
1370	Neonatal rat	1
1371	neonate	1
1372	Nepal	1
1373	nerve injury	1
1374	nerve regeneration	1
1375	nervous system	1
1376	Network medicine	1
1377	neurodegenerative diseases	1
1378	neurofeedback	1
1379	neuroimaging	1
1380	neuroinflammation	1
1381	neuromuscular	1
1382	neuromuscular disease	1
1383	Neuroplasticity	1
1384	Neuroprotection	1
1385	neuroprotection	1
1386	Neuroprotection	1
1387	Neuropsychiatric disorders	1
1388	neuroticism	1
1389	neurotrophic factors	1
1390	Next	1
1391	next generation sequencing	1
1392	NG	1
1393	NHANES	1
1394	Niacin	1
1395	Nightmares	1
1396	nitrates/nitrites	1
1397	NLRP3	1
1398	nod	1
1399	Non	1
1400	non	1
1401	Nonalcoholic fatty liver disease	1
1402	nonalcoholic fatty liver disease	1
1403	nonpharmacological	1
1404	Nonsurgical treatment	1
1405	nuclear magnetic resonance spectroscopy	1
1406	Number of samples needed	1
1407	Nutraceutical	1
1408	Nutraceutical	1
1409	nutraceutical	1
1410	nutraceutical compounds	1
1411	Nutraceuticals	1
1412	nutraceuticals	1
1413	Nutraceuticals	1
1414	nutraceuticals.	1
1415	Nutraceutics	1
1416	nutri	1
1417	NutriCatt protocol	1
1418	nutrient	1
1419	Nutrient	1
1420	nutrient	1
1421	nutrients	1
1422	Nutrients	1
1423	Nutrients	1
1424	nutrients	1
1425	nutrigenetics	1
1426	Nutrigenetics	1
1427	Nutrigenetics	1
1428	Nutrigenomics	1
1429	nutriproteomics	1
1430	Nutrition	1
1431	nutrition	1
1432	nutrition	1
1433	nutrition	1
1434	Nutrition	1
1435	Nutrition	1
1436	Nutrition	1
1437	nutrition	1
1438	nutrition assessment	1
1439	Nutrition intervention	1
1440	Nutritional assessment	1
1441	Nutritional counseling	1
1442	Nutritional deficiencies	1
1443	nutritional genetics	1
1444	nutritional genomics	1
1445	nutritional intervention	1
1446	Nutritional intervention	1
1447	Nutritional management	1
1448	Nutritional rickets prevention	1
1449	nutritional security	1
1450	Nutritional software	1
1451	Nutritional status	1
1452	nutritional supplementation	1
1453	nutritional supplements	1
1454	nutritional supplements	1
1455	Nutritional therapy	1
1456	nutritional therapy	1
1457	Nutritive value	1
1458	O3FA	1
1459	Obesity	1
1460	obesity	1
1461	Obesity	1
1462	obesity	1
1463	Obesity	1
1464	oleanolic acid	1
1465	oleoresin	1
1466	oligosaccharides	1
1467	olive	1
1468	Olive products	1
1469	omega	1
1470	Omega	1
1471	Omega	1
1472	omega	1
1473	omics	1
1474	Onabotulinum toxin A	1
1475	ONS	1
1476	open	1
1477	Oral branched	1
1478	oral delivery	1
1479	oral drug delivery	1
1480	oral dysbiosis	1
1481	oral health	1
1482	oral hygiene	1
1483	oral mucositis	1
1484	Oral nutritional supplement	1
1485	oral nutritional supplementation	1
1486	Oral nutritional supplements	1
1487	oral nutritional supplements	1
1488	oral squamous cell carcinoma (OSCC)	1
1489	Oral surgeons	1
1490	Orbitrap	1
1491	Organic food	1
1492	Osmolarity	1
1493	osteoarthritis	1
1494	Osteoarthritis	1
1495	osteoblasts	1
1496	osteocalcin	1
1497	osteoclasts	1
1498	osteopenia	1
1499	Osteoporosis	1
1500	osteoporosis	1
1501	outcomes	1
1502	ovarian cancer	1
1503	overall survival	1
1504	overt inflammation and chronic diseases	1
1505	overweight	1
1506	oxidation resistance	1
1507	oxidative stress	1
1508	oxidative stress	1
1509	oxidative stress	1
1510	oxylipins	1
1511	Oxytocin	1
1512	P	1
1513	P. acnes	1
1514	paediatric	1
1515	paediatrics	1
1516	Palatability	1
1517	pancreatic cancer	1
1518	parental asthma	1
1519	Parkinson disease	1
1520	Participatory Learning and Action	1
1521	pathogenic	1
1522	Pathogenic strain	1
1523	Patient navigators	1
1524	PBMC	1
1525	PDAC	1
1526	Pediatric	1
1527	pediatric obesity	1
1528	PEG	1
1529	peptide	1
1530	percent predicted of forced expiratory volume in 1ás	1
1531	percutaneous endoscopic gastronomy	1
1532	Peri	1
1533	perinatology	1
1534	Periodontal disease	1
1535	periodontal disease	1
1536	periodontitis	1
1537	peripheral nerve injury	1
1538	Permanganate reducing	1
1539	persistent pain	1
1540	personalised	1
1541	Personalised medicine	1
1542	Personalised nutrition	1
1543	Personalized Addiction Medicine	1
1544	personalized cancer therapy	1
1545	personalized diet	1
1546	personalized dietary interventions	1
1547	personalized healthcare	1
1548	Personalized medicine	1
1549	Personalized medicine	1
1550	Personalized medicine	1
1551	personalized medicine	1
1552	Personalized nutrition	1
1553	Personalized nutrition	1
1554	personalized nutrition	1
1555	Personalized therapy	1
1556	Pesticides and neurodegeneration. Xenobiotics and metabolism	1
1557	Pgc	1
1558	Pharmaceutical	1
1559	pharmacogenetics	1
1560	pharmacogenetics, vitamins	1
1561	pharmacogenomics	1
1562	pharmacokinetic	1
1563	Pharmacokinetics	1
1564	pharmacokinetics	1
1565	pharmacologic processes	1
1566	pharmacological	1
1567	pharmacological ergogenic aid	1
1568	pharmacological therapy	1
1569	phenotype	1
1570	Phenotype	1
1571	phosphatidylcholine	1
1572	Phosphodieserase	1
1573	Phospholipase A(2) (PLA(2))	1
1574	phospholipids	1
1575	phosphoproteomics	1
1576	photoreceptors	1
1577	phyloquinone	1
1578	Physical activity	1
1579	physical activity	1
1580	physical exercise	1
1581	Physical function	1
1582	phytochemical	1
1583	Phytochemicals	1
1584	Phytochemicals	1
1585	Phytosteroids	1
1586	PINK1/Parkin	1
1587	Plan nutricional	1
1588	planetary health	1
1589	plant molecular farming	1
1590	Plant sterols	1
1591	Plants	1
1592	Plasma	1
1593	Plasma oxalic acid	1
1594	PN personalised nutrition	1
1595	policy	1
1596	polycystic ovary syndrome	1
1597	Polygenic risk score	1
1598	polymeric carriers	1
1599	Polymorphism	1
1600	polyols	1
1601	Polyphenols	1
1602	polysaccharopeptide	1
1603	polysorbate	1
1604	polyunsaturated fat	1
1605	Polyunsaturated fatty acid	1
1606	polyunsaturated fatty acid	1
1607	polyunsaturated fatty acids	1
1608	pooled analysis	1
1609	population pharmacokinetics	1
1610	porphyria	1
1611	Post	1
1612	post	1
1613	Postbiotic	1
1614	Potentially illegal adulteration	1
1615	Pouchitis	1
1616	Pragmatic protocol	1
1617	prebiotic	1
1618	Prebiotics	1
1619	Prebiotics	1
1620	precision healthcare	1
1621	precision medicine	1
1622	Precision medicine	1
1623	Precision medicine	1
1624	precision microbiome modulation	1
1625	precision nutraceuticals	1
1626	Precision nutrition	1
1627	Preclinical AlzheimerÆs disease	1
1628	Preclinical models	1
1629	preclinical studies	1
1630	prediabetes	1
1631	Predictive preventive personalized medicine	1
1632	Pregnancy	1
1633	Pregnancy	1
1634	Pregnant woman	1
1635	Prehabilitation	1
1636	prenatal maternal asthma control	1
1637	prenatal vitamin D	1
1638	preoperative care	1
1639	Prevention	1
1640	Prevention	1
1641	prevention and control	1
1642	preventive medicine	1
1643	Primaryûsecondary amine adsorbent	1
1644	pro	1
1645	Pro	1
1646	Pro	1
1647	proanthocyanidins	1
1648	Probi≤tico	1
1649	Probiotic	1
1650	probiotic	1
1651	Probiotic combination	1
1652	Probiotic therapy	1
1653	probiotics	1
1654	Probiotics	1
1655	Probiotics	1
1656	Probiotics	1
1657	Probiotics	1
1658	probiotics	1
1659	Probiotics	1
1660	probiotics intervention	1
1661	probiotics phenylketonuria (PKU)	1
1662	probiotics supplementation	1
1663	probiotikumok	1
1664	Process optimisation	1
1665	process optimization	1
1666	Prodromal AlzheimerÆs disease	1
1667	Prophylactic	1
1668	propionate	1
1669	Prostaglandin E(2)	1
1670	prostaglandin E(2) (PGE(2))	1
1671	prostaglandin E2	1
1672	Prostate cancer prevention	1
1673	Protein intake	1
1674	Protein quantitative trait locus	1
1675	protein synthesis/degradation	1
1676	Proteomics	1
1677	Psychiatric research	1
1678	psychocognitive evaluation	1
1679	PTSD	1
1680	Public health	1
1681	pulmonary rehabilitation	1
1682	Putative natural dopamine agonist	1
1683	PXR	1
1684	Pylera(R)	1
1685	Pyridoxine	1
1686	pyruvate supplementation	1
1687	QoL	1
1688	Qualitation	1
1689	quality assessment	1
1690	quality control	1
1691	quality of life	1
1692	Quality of life	1
1693	quality of life	1
1694	Quantitation	1
1695	Quercetin	1
1696	quercetin	1
1697	quetiapine	1
1698	Radiotherapy	1
1699	radiotherapy	1
1700	radiotherapy and chemotherapy	1
1701	rapamycin	1
1702	ratio	1
1703	RBC	1
1704	reactive oxygen species	1
1705	recombinant	1
1706	Red blood cell	1
1707	Regeneration	1
1708	regeneration	1
1709	Rehabilitation	1
1710	Rehabilitation	1
1711	rehabilitation	1
1712	rehabilitation	1
1713	relapse	1
1714	relative bioavailability	1
1715	Reliability of iodine nutrition surveillance	1
1716	renal function	1
1717	Renin	1
1718	repurposing approved drugs	1
1719	Resistant starch	1
1720	resistant starch	1
1721	resistant starch type 4	1
1722	resolvin D1	1
1723	respiratory tract infections	1
1724	respiratory viral diseases	1
1725	Responders	1
1726	responders	1
1727	Response surface methodology	1
1728	Retina	1
1729	retinal function	1
1730	Review	1
1731	review	1
1732	revive immunity	1
1733	reward deficiency syndrome	1
1734	reward deficiency syndrome (RDS)	1
1735	Reward Deficiency Syndrome (RDS)	1
1736	risk	1
1737	RNA	1
1738	ROS addiction	1
1739	Rosmarinus officinalis L.	1
1740	RT	1
1741	rumination	1
1742	Running	1
1743	s	1
1744	S. epidermidis	1
1745	Safety and efficacy	1
1746	saffron	1
1747	sanghuang mushroom	1
1748	Sanghuangporus lonicericola	1
1749	Sarcopenia	1
1750	Sarcopenic obesity	1
1751	SARS	1
1752	SARs	1
1753	SARSùCoV	1
1754	SCFA	1
1755	scheduling	1
1756	Schwann cells	1
1757	Screening	1
1758	Se	1
1759	seaweeds	1
1760	secondary metaabolites	1
1761	Securidaca inappendiculata	1
1762	selectivity	1
1763	selenoproteins	1
1764	Semaglutide	1
1765	sensorimotor neuropathy	1
1766	Serotonin	1
1767	Serum analysis	1
1768	Shejin	1
1769	short	1
1770	Short	1
1771	short chain fatty acids	1
1772	shRNA	1
1773	Sildenafil	1
1774	silver nanoparticles	1
1775	silymarin	1
1776	Simultaneous analysis	1
1777	single nucleotide polymorphism	1
1778	Single nucleotide polymorphism	1
1779	SIRT	1
1780	Sirtuins	1
1781	Situaciones especiales	1
1782	SjogrenÆs syndrome	1
1783	skeletal disease	1
1784	skeletal muscle	1
1785	Skeletonema marinoi	1
1786	Skill	1
1787	skin	1
1788	SLC25A10 and DIC deficiency	1
1789	sleep disturbances	1
1790	sleeve gastrectomy	1
1791	Small peptides	1
1792	SNAS	1
1793	social justice	1
1794	sodium lauryl sulfate	1
1795	solid phase extraction	1
1796	Solid phase extraction	1
1797	solubility	1
1798	soluble fiber	1
1799	Souvenaid	1
1800	specialized foodstuffs	1
1801	Specialized pro	1
1802	spectrophotometric assay	1
1803	sphingolipids	1
1804	sphingosine 1	1
1805	Spinach extract	1
1806	spinal cord injury	1
1807	spirulina	1
1808	spontaneously hypertensive rats	1
1809	sports	1
1810	sports ethics.	1
1811	stable isotope	1
1812	Standard addition	1
1813	standardized 25(OH)D	1
1814	steatohepatitis	1
1815	steatosis	1
1816	stem cells	1
1817	Steroids	1
1818	stilbenes	1
1819	Strain	1
1820	Stress	1
1821	stress	1
1822	stroke	1
1823	stunting	1
1824	sucrose	1
1825	Sulfation pattern	1
1826	sulfation patterns	1
1827	Supplement	1
1828	supplementation study	1
1829	Surgery	1
1830	survival	1
1831	Survivors	1
1832	Survivorship care plan	1
1833	Symbiotic bacterial systems	1
1834	symbiotics	1
1835	Synbiotic	1
1836	Synbiotics	1
1837	synbiotics	1
1838	synthesis	1
1839	synthetic biology	1
1840	systematic review	1
1841	Systematic review	1
1842	systematic review of systematic reviews	1
1843	systemic inflammation	1
1844	systems biology	1
1845	systems medicine	1
1846	T2D	1
1847	targeted	1
1848	taro	1
1849	telehealth	1
1850	telomerase	1
1851	terminology	1
1852	Testosterone	1
1853	Tetrahydrocurcumin	1
1854	TGAb thyroglobulin antibodies	1
1855	therapeutic microbiota manipulations	1
1856	Therapy	1
1857	Thiamine	1
1858	Thymus	1
1859	Thyroglobulin	1
1860	time trial performance	1
1861	Tirzepatide	1
1862	titanium dioxide	1
1863	TMAO	1
1864	tocopherols	1
1865	Tocophersolan	1
1866	tocotrienols	1
1867	Tolerability	1
1868	Toll	1
1869	Total antioxidant capacity	1
1870	toxicity evaluation	1
1871	Trace elements	1
1872	traditional Chinese medicine	1
1873	transcriptomic	1
1874	transfusion	1
1875	Transgenomic interactions	1
1876	Transition dairy cow	1
1877	translational medicine	1
1878	Translational research	1
1879	translational research	1
1880	translational research/science	1
1881	trauma	1
1882	treatment	1
1883	treatment	1
1884	Treatment	1
1885	Treatment	1
1886	treatment outcomes	1
1887	treatment trials	1
1888	tricarboxylic acid cycle	1
1889	triggers	1
1890	triglycerides	1
1891	trimethylamine N	1
1892	triple quadrupole mass spectrometry	1
1893	Tube feeding	1
1894	tuberculosis	1
1895	tumor heterogeneity	1
1896	tumor microbiome	1
1897	Tumor microenvironment	1
1898	tumor microenvironment	1
1899	tumour markers	1
1900	tumours	1
1901	type	1
1902	type 2 diabetes mellitus	1
1903	Type 2 diabetes mellitus	1
1904	type I NADH dehydrogenase	1
1905	UIC urinary iodine concentration	1
1906	UL	1
1907	ulcerative colitis	1
1908	Ultra	1
1909	umbrella design	1
1910	unified medical language system	1
1911	Unmet needs	1
1912	upper limit of intake	1
1913	uremic sarcopenia	1
1914	Urinary iodine excretion	1
1915	Urine oxalate excretion	1
1916	utilization	1
1917	vaccine	1
1918	Vaginal dysbiosis	1
1919	vaginal microbiome	1
1920	Vaginal microbiota transplantation	1
1921	validation	1
1922	Validation	1
1923	vascular calcification	1
1924	vascular function	1
1925	vasomotor symptoms	1
1926	VDR gene	1
1927	VDR vitamin D receptor	1
1928	Vegetable	1
1929	Vietnam	1
1930	viral replication.	1
1931	virome	1
1932	Virulence factors	1
1933	virus infected cells	1
1934	Visceral hyperalgesia	1
1935	Visceral obesity	1
1936	vitality and sustainability	1
1937	vitamin	1
1938	vitamin A	1
1939	Vitamin A	1
1940	Vitamin B2	1
1941	vitamin C	1
1942	Vitamin D	1
1943	vitamin D	1
1944	vitamin D	1
1945	vitamin D	1
1946	vitamin D	1
1947	vitamin D	1
1948	Vitamin D	1
1949	Vitamin D deficiency	1
1950	Vitamin D deficiency	1
1951	vitamin D deficiency	1
1952	vitamin D status	1
1953	Vitamin D supplementation	1
1954	vitamin D supplements	1
1955	Vitamin D2	1
1956	Vitamin D3	1
1957	vitamin E supplementation	1
1958	Vitamin K1	1
1959	vitamin K2	1
1960	Vitamins	1
1961	vitamins	1
1962	vitamins and minerals	1
1963	Vitamins supplementation	1
1964	VMT	1
1965	VSL#3	1
1966	water balance.	1
1967	Weight and appetite	1
1968	Weight loss	1
1969	weight loss programs	1
1970	weight management	1
1971	Wellbeing	1
1972	wellness and genomics	1
1973	western diet	1
1974	Whey	1
1975	Whey proteins	1
1976	whole food	1
1977	Whole genome sequencing	1
1978	women	1
1979	women's health	1
1980	worry	1
1981	Wound healing	1
1982	xenobiotics	1
1983	yeast ?	1
1984	yogurt	1
1985	yohimbine	1
1986	zebrafish embryos	1
1987	Zika virus	1
1988	Zinc/copper/seleniumûgene interactions	1
