# Supplementary material for: Nutraceuticals in Personalized and Precision Medicine – a preliminary scoping review indicates efficacy for disease treatment, general wellbeing, and defense against Covid-19
Source: Preprints.org preprint supplement (doi:10.20944/preprints202211.0070.v1), 2022-11-03
Supplement: Supplementary file 2 [file Supp_Notes.docx]

**SUPPLEMENTARY NOTES**

**PubMed Search Result Details.**

Search Actions Details Query Results

*Search: nutraceuticals personalized medicine*

("dietary supplements"[MeSH Terms] OR ("dietary"[All Fields] AND "supplements"[All Fields]) OR "dietary supplements"[All Fields] OR "nutraceutical"[All Fields] OR "nutraceuticals"[All Fields] OR "nutraceutic"[All Fields] OR "nutraceutically"[All Fields] OR "nutraceutics"[All Fields]) AND ("precision medicine"[MeSH Terms] OR ("precision"[All Fields] AND "medicine"[All Fields]) OR "precision medicine"[All Fields] OR ("personalized"[All Fields] AND "medicine"[All Fields]) OR "personalized medicine"[All Fields])

Translations

nutraceuticals: "dietary supplements"[MeSH Terms] OR ("dietary"[All Fields] AND "supplements"[All Fields]) OR "dietary supplements"[All Fields] OR "nutraceutical"[All Fields] OR "nutraceuticals"[All Fields] OR "nutraceutic"[All Fields] OR "nutraceutically"[All Fields] OR "nutraceutics"[All Fields]

personalized medicine: "precision medicine"[MeSH Terms] OR ("precision"[All Fields] AND "medicine"[All Fields]) OR "precision medicine"[All Fields] OR ("personalized"[All Fields] AND "medicine"[All Fields]) OR "personalized medicine"[All Fields]

596

*Search: neutraceuticals personalized medicine*

("dietary supplements"[MeSH Terms] OR ("dietary"[All Fields] AND "supplements"[All Fields]) OR "dietary supplements"[All Fields] OR "nutraceutical"[All Fields] OR "nutraceuticals"[All Fields]) AND ("precision medicine"[MeSH Terms] OR ("precision"[All Fields] AND "medicine"[All Fields]) OR "precision medicine"[All Fields] OR ("personalized"[All Fields] AND "medicine"[All Fields]) OR "personalized medicine"[All Fields])

Translations

nutraceuticals: "dietary supplements"[MeSH Terms] OR ("dietary"[All Fields] AND "supplements"[All Fields]) OR "dietary supplements"[All Fields] OR "nutraceutical"[All Fields] OR "nutraceuticals"[All Fields]

personalized medicine: "precision medicine"[MeSH Terms] OR ("precision"[All Fields] AND "medicine"[All Fields]) OR "precision medicine"[All Fields] OR ("personalized"[All Fields] AND "medicine"[All Fields]) OR "personalized medicine"[All Fields]

502

*Search: nutraceuticals precision medicine*

("dietary supplements"[MeSH Terms] OR ("dietary"[All Fields] AND "supplements"[All Fields]) OR "dietary supplements"[All Fields] OR "nutraceutical"[All Fields] OR "nutraceuticals"[All Fields] OR "nutraceutic"[All Fields] OR "nutraceutically"[All Fields] OR "nutraceutics"[All Fields]) AND ("precision medicine"[MeSH Terms] OR ("precision"[All Fields] AND "medicine"[All Fields]) OR "precision medicine"[All Fields])

Translations

nutraceuticals: "dietary supplements"[MeSH Terms] OR ("dietary"[All Fields] AND "supplements"[All Fields]) OR "dietary supplements"[All Fields] OR "nutraceutical"[All Fields] OR "nutraceuticals"[All Fields] OR "nutraceutic"[All Fields] OR "nutraceutically"[All Fields] OR "nutraceutics"[All Fields]

precision medicine: "precision medicine"[MeSH Terms] OR ("precision"[All Fields] AND "medicine"[All Fields]) OR "precision medicine"[All Fields]

352

*Search: neutraceuticals precision medicine*

("dietary supplements"[MeSH Terms] OR ("dietary"[All Fields] AND "supplements"[All Fields]) OR "dietary supplements"[All Fields] OR "nutraceutical"[All Fields] OR "nutraceuticals"[All Fields]) AND ("precision medicine"[MeSH Terms] OR ("precision"[All Fields] AND "medicine"[All Fields]) OR "precision medicine"[All Fields])

Translations

nutraceuticals: "dietary supplements"[MeSH Terms] OR ("dietary"[All Fields] AND "supplements"[All Fields]) OR "dietary supplements"[All Fields] OR "nutraceutical"[All Fields] OR "nutraceuticals"[All Fields]

precision medicine: "precision medicine"[MeSH Terms] OR ("precision"[All Fields] AND "medicine"[All Fields]) OR "precision medicine"[All Fields]

292

**Keyword sorting and counting**

Rayyan returned a total of 1492 keywords (468 unique) from 486 of the 598 articles. 486 articles had one or more keywords, 328 had two or more keywords, 193 had more three or more keywords, 116 had four or more, 78 had five or more, 40 had 10 or more, 37 had 11 or more, 26 had 12 or more, 16 had 13 or more, and one paper had 16 keywords.
